# Supplementary material
Source: PubMed Central journal article supplement (PMC7771612)
Supplement: JGMED20001731.pdf [file JGMED20001731.pdf]

**Supplementary Data**

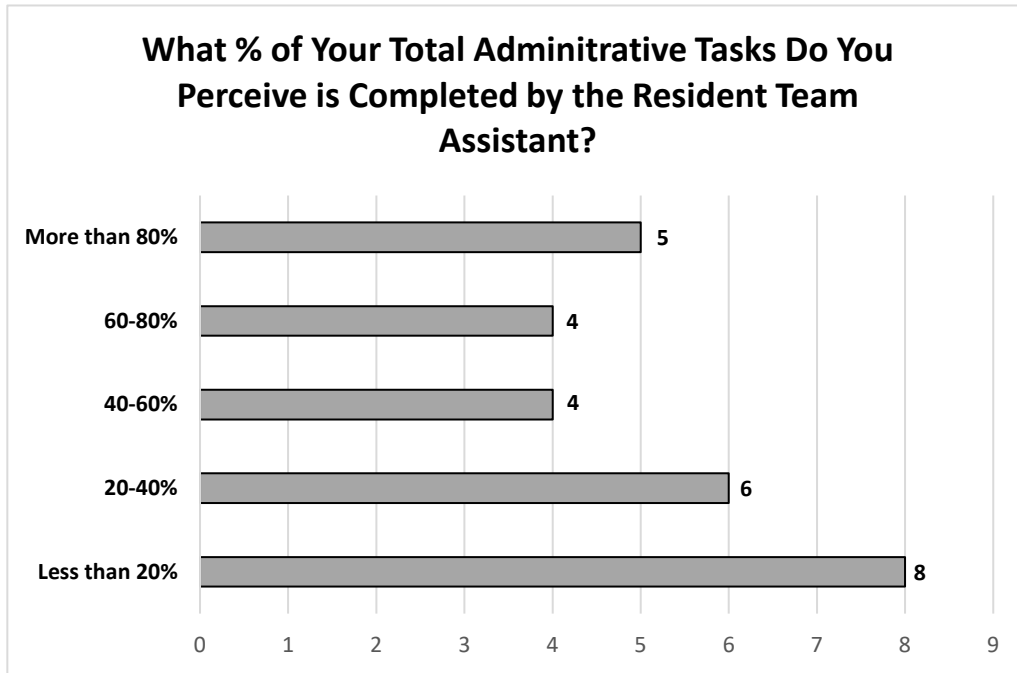

**FIGURE**  
Resident Survey, Spring 2018 (n=27, response rate of 92% of interns/residents actively on inpatient teams with a designated RTA)

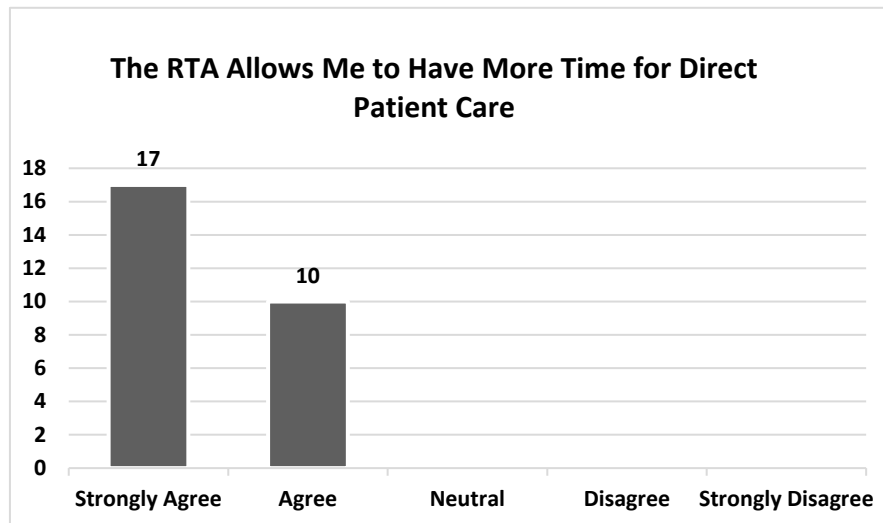

**FIGURE**  
Resident Survey, Spring 2018 (n=27, response rate of 92% of interns/residents actively on inpatient teams with a designated RTA)

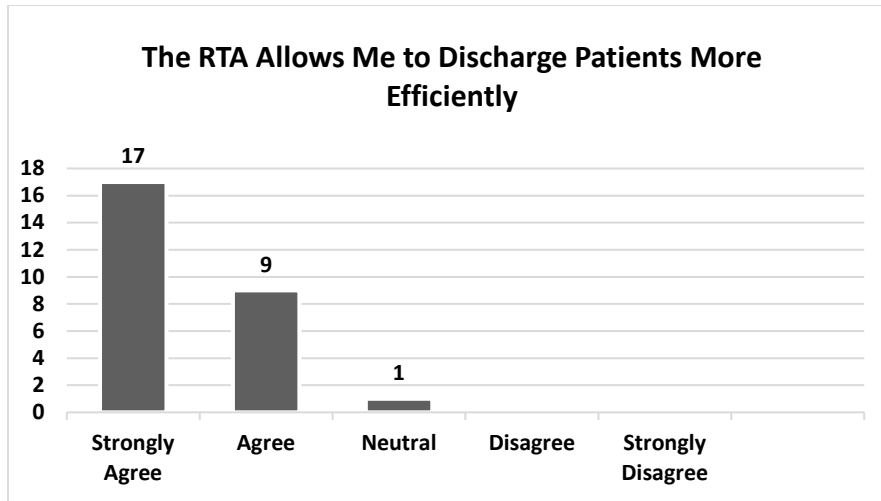

**FIGURE**  
Resident Survey, Spring 2018 (n=27, response rate of 92% of interns/residents actively on inpatient teams with a designated RTA)

Takei R, Dalembert G, Ronan J, Washington N, Tank S, Perry M, et al. Implementing resident team assistant programs at academic medical centers: lessons learned. *J Grad Med Educ.* 2020;12(6):769–772.

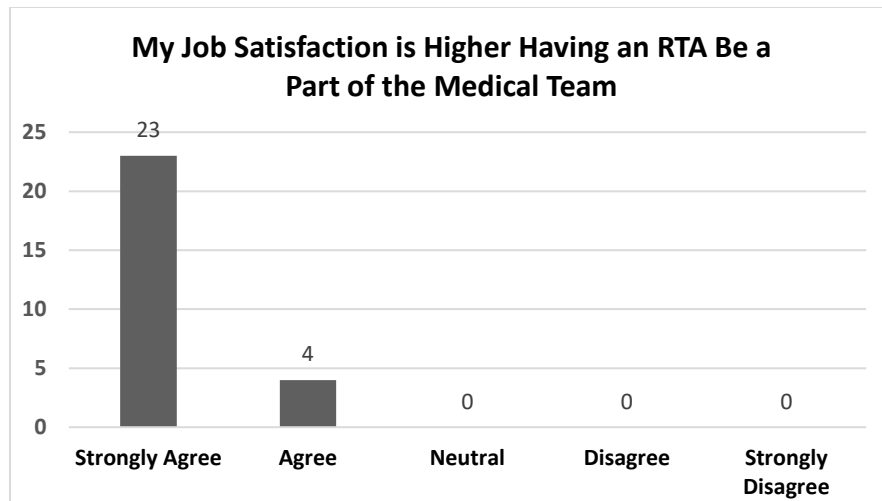

**FIGURE**  
Resident Survey, Spring 2018 (n=27, response rate of 92% of interns/residents actively on inpatient teams with a designated RTA)

Takei R, Dalembert G, Ronan J, Washington N, Tank S, Perry M, et al. Implementing resident team assistant programs at academic medical centers: lessons learned. *J Grad Med Educ.* 2020;12(6):769–772.

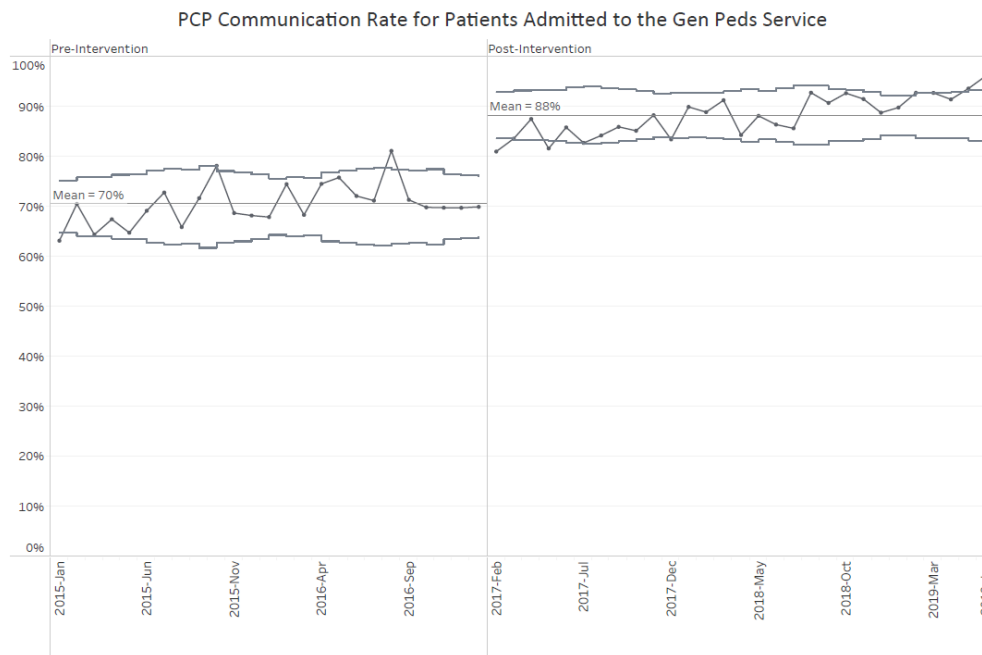

**FIGURE**  
PCP Admission Notification Rate for Admitted General Pediatrics Patients (PCP: Primary Care Pediatrician)

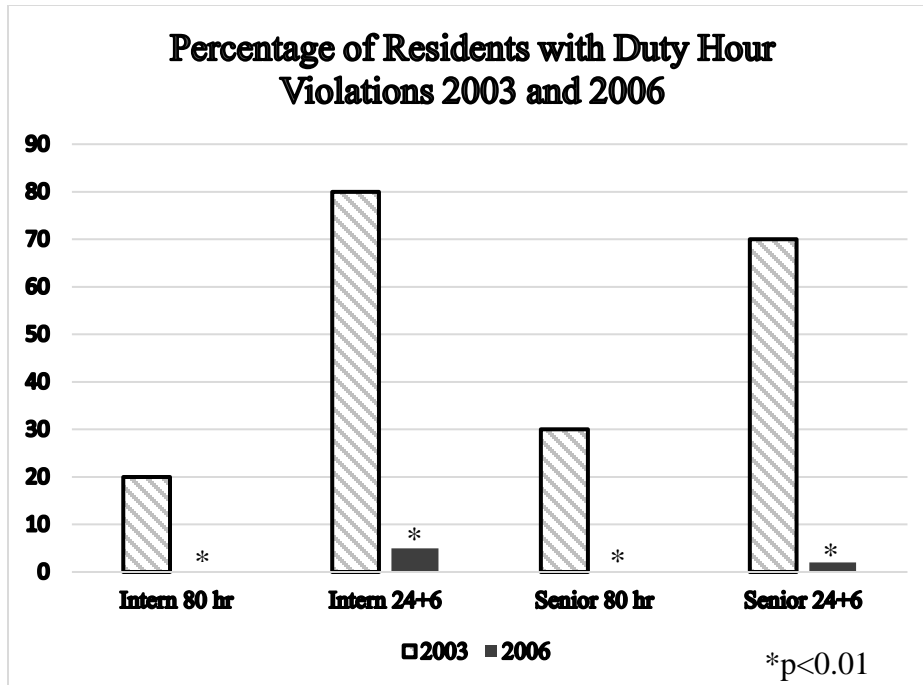

**FIGURE**  
Improvement in Duty Hour Violations After Implementation of RTA Program, Annual ACGME Surveys

**Resident Survey, Spring 2018 (Modified to remove institution name)**

---

**Front Line Clinician: Resident Team Assistant Feedback  
Spring 2018**

---

- 1) What is your current role?
  - A. PL-1
  - B. PL-2
  - C. PL-3
  - D. PL-4
  
- 2) Please select the team you worked on during block 12:
  - A. Blue (3E CSH/ 4W CSH) resident team
  - B. Adolescent/GP team
  - C. Red (5E) resident team
  - D. Yellow resident team
  - E. 8S resident team
  - F. 9S resident team
  - G. Other: please specify \_\_\_\_\_
  
- 3) What % of the medical team's total administrative tasks do you perceive is completed by the RTA?
  - A. Less than 20%
  - B. 20-40%
  - C. 40-60%
  - D. 60-80%
  - E. More than 80%
  
- 4) The Resident Team Assistant allows me to have more time for direct patient care.
  - A. Strongly agree
  - B. Agree
  - C. Neutral

Takei R, Dalembert G, Ronan J, Washington N, Tank S, Perry M, et al. Implementing resident team assistant programs at academic medical centers: lessons learned. *J Grad Med Educ.* 2020;12(6):769–772.

- D. Disagree
- E. Strongly disagree

5) The RTA allows me to discharge patients more efficiently

- A. Strongly agree
- B. Agree
- C. Neutral
- D. Disagree
- E. Strongly disagree

6) I am able to spend more time using my clinical skills by having a Resident Team Assistant as part of the medical team.

- A. Strongly agree
- B. Agree
- C. Neutral
- D. Disagree
- E. Strongly disagree

7) My job satisfaction is higher having the RTAs help with the administrative tasks.

- A. Strongly agree
- B. Agree
- C. Neutral
- D. Disagree
- E. Strongly disagree

8) What are the tasks you feel the RTA was most helpful in completing?

9) What jobs/tasks did not work well when assigned to the RTA?

10) Are there other jobs/tasks that you wish the RTAs can help with?



Takei R, Dalembert G, Ronan J, Washington N, Tank S, Perry M, et al. Implementing resident team assistant programs at academic medical centers: lessons learned. *J Grad Med Educ.* 2020;12(6):769–772.
